# Supplementary material
Source: publisher figshare collection journal article supplement (https://acs.figshare.com/ndownloader/files/5172433)
Supplement: Supplementary file 1 [file 5172433]

data_l

_audit_creation_method            SHELXL-97
_chemical_name_systematic
;
 ?
;
_chemical_name_common             ?
_chemical_melting_point           ?
_chemical_formula_moiety          ?
_chemical_formula_sum
 'C26 H19 N3 O5 Zn'
_chemical_formula_weight          518.81

loop_
 _atom_type_symbol
 _atom_type_description
 _atom_type_scat_dispersion_real
 _atom_type_scat_dispersion_imag
 _atom_type_scat_source
 'C'  'C'   0.0033   0.0016
 'International Tables Vol C Tables 4.2.6.8 and 6.1.1.4'
 'H'  'H'   0.0000   0.0000
 'International Tables Vol C Tables 4.2.6.8 and 6.1.1.4'
 'N'  'N'   0.0061   0.0033
 'International Tables Vol C Tables 4.2.6.8 and 6.1.1.4'
 'O'  'O'   0.0106   0.0060
 'International Tables Vol C Tables 4.2.6.8 and 6.1.1.4'
 'Zn'  'Zn'   0.2839   1.4301
 'International Tables Vol C Tables 4.2.6.8 and 6.1.1.4'

_symmetry_cell_setting            Monoclinic
_symmetry_space_group_name_H-M    P 2(1)/n
loop_
 _symmetry_equiv_pos_as_xyz
 'x, y, z'
 '-x+1/2, y+1/2, -z+1/2'
 '-x, -y, -z'
 'x-1/2, -y-1/2, z-1/2'

_cell_length_a                    13.1498(5)
_cell_length_b                    12.9277(6)
_cell_length_c                    13.7201(6)
_cell_angle_alpha                 90.00
_cell_angle_beta                  101.9150(10)
_cell_angle_gamma                 90.00
_cell_volume                      2282.12(17)
_cell_formula_units_Z             4
_cell_measurement_temperature     293(2)
_cell_measurement_reflns_used     3246
_cell_measurement_theta_min       2.51
_cell_measurement_theta_max       25.06

_exptl_crystal_description        'block'
_exptl_crystal_colour             'yellow'
_exptl_crystal_size_max            .72
_exptl_crystal_size_mid            .40
_exptl_crystal_size_min            .20
_exptl_crystal_density_meas       ?
_exptl_crystal_density_diffrn     1.510
_exptl_crystal_density_method     'not measured'
_exptl_crystal_F_000              1064
_exptl_absorpt_coefficient_mu     1.120
_exptl_absorpt_correction_type    empirical
_exptl_absorpt_process_details    'SADABS (Sheldrick, 1996)'
_exptl_absorpt_correction_T_min    .3344
_exptl_absorpt_correction_T_max   1.0000


_exptl_special_details
;
 ?
;

_diffrn_ambient_temperature       293(2)
_diffrn_radiation_wavelength      0.71073
_diffrn_radiation_type            MoK\a
_diffrn_radiation_source          'fine-focus sealed tube'
_diffrn_radiation_monochromator   graphite
_diffrn_measurement_device_type   ?
_diffrn_measurement_method        ?
_diffrn_detector_area_resol_mean  ?
_diffrn_standards_number          none
_diffrn_standards_interval_count  none
_diffrn_standards_interval_time   none
_diffrn_standards_decay_%         none
_diffrn_reflns_number             6987
_diffrn_reflns_av_R_equivalents   0.0376
_diffrn_reflns_av_sigmaI/netI     0.0481
_diffrn_reflns_limit_h_min        -10
_diffrn_reflns_limit_h_max        15
_diffrn_reflns_limit_k_min        -15
_diffrn_reflns_limit_k_max        15
_diffrn_reflns_limit_l_min        -16
_diffrn_reflns_limit_l_max        14
_diffrn_reflns_theta_min          2.51
_diffrn_reflns_theta_max          25.06
_reflns_number_total              3993
_reflns_number_gt                 3067
_reflns_threshold_expression      >2sigma(I)

_computing_data_collection        'Siemens SMART'
_computing_cell_refinement        'Siemens SMART & SAINT'
_computing_data_reduction         'Siemens XPREP'
_computing_structure_solution     'Siemens SHELXTL'
_computing_structure_refinement   'Siemens SHELXTL'
_computing_molecular_graphics     ?
_computing_publication_material   ?

_refine_special_details
;
 Refinement of F^2^ against ALL reflections.  The weighted R-factor wR and
 goodness of fit S are based on F^2^, conventional R-factors R are based
 on F, with F set to zero for negative F^2^. The threshold expression of
 F^2^ > 2sigma(F^2^) is used only for calculating R-factors(gt) etc. and is
 not relevant to the choice of reflections for refinement.  R-factors based
 on F^2^ are statistically about twice as large as those based on F, and R-
 factors based on ALL data will be even larger.
;

_refine_ls_structure_factor_coef  Fsqd
_refine_ls_matrix_type            full
_refine_ls_weighting_scheme     calc
_refine_ls_weighting_details      calc
_refine_ls_weighting_details
 'calc w=1/[\s^2^(Fo^2^)+(0.0161P)^2^+8.6322P] where P=(Fo^2^+2Fc^2^)/3'
_atom_sites_solution_primary      direct
_atom_sites_solution_secondary    difmap
_atom_sites_solution_hydrogens    geom
_refine_ls_hydrogen_treatment     mixed
_refine_ls_extinction_method      none
_refine_ls_extinction_coef        ?
_refine_ls_number_reflns          3993
_refine_ls_number_parameters      392
_refine_ls_number_restraints      0
_refine_ls_R_factor_ref           0.1143
_refine_ls_R_factor_gt            0.0844
_refine_ls_wR_factor_ref          0.1722
_refine_ls_wR_factor_gt           0.1566
_refine_ls_goodness_of_fit_ref    1.263
_refine_ls_restrained_S_all       1.263
_refine_ls_shift/su_max           0.000
_refine_ls_shift/su_mean          0.000

loop_
 _atom_site_label
 _atom_site_type_symbol
 _atom_site_fract_x
 _atom_site_fract_y
 _atom_site_fract_z
 _atom_site_U_iso_or_equiv
 _atom_site_adp_type
 _atom_site_occupancy
 _atom_site_symmetry_multiplicity
 _atom_site_calc_flag
 _atom_site_refinement_flags
 _atom_site_disorder_assembly
 _atom_site_disorder_group
Zn1 Zn 0.63495(6) 0.42961(6) 0.19630(5) 0.0532(3) Uani 1 1 d . . .
C1 C 0.8113(6) 0.3871(6) 0.3442(5) 0.0581(18) Uani 1 1 d . . .
C2 C 0.8663(5) 0.4000(5) 0.4522(4) 0.0457(15) Uani 1 1 d . . .
C3 C 0.8467(6) 0.4840(6) 0.5065(5) 0.0557(18) Uani 1 1 d . . .
C4 C 0.8928(6) 0.4934(6) 0.6062(5) 0.0604(18) Uani 1 1 d . . .
C5 C 0.9574(6) 0.4159(6) 0.6508(5) 0.0577(19) Uani 1 1 d . . .
H5 H 0.988(5) 0.420(5) 0.714(5) 0.06(2) Uiso 1 1 d . . .
C6 C 0.9764(5) 0.3314(5) 0.5977(5) 0.0493(16) Uani 1 1 d . . .
C7 C 0.9324(5) 0.3239(6) 0.4977(5) 0.0496(16) Uani 1 1 d . . .
H7 H 0.950(5) 0.271(5) 0.467(4) 0.048(19) Uiso 1 1 d . . .
C8 C 1.0392(6) 0.2438(6) 0.6510(6) 0.064(2) Uani 1 1 d . . .
C11 C 0.7514(6) 0.6034(6) 0.1294(6) 0.0584(19) Uani 1 1 d . . .
H11 H 0.766(4) 0.613(5) 0.190(4) 0.038(17) Uiso 1 1 d . . .
C12 C 0.7953(6) 0.6648(6) 0.0684(6) 0.062(2) Uani 1 1 d . . .
H12 H 0.839(5) 0.709(5) 0.098(5) 0.047(19) Uiso 1 1 d . . .
C13 C 0.7733(6) 0.6444(6) -0.0331(5) 0.0593(18) Uani 1 1 d . . .
C14 C 0.8224(7) 0.7056(7) -0.1020(6) 0.070(2) Uani 1 1 d . . .
H14 H 0.828(6) 0.677(6) -0.164(6) 0.07(2) Uiso 1 1 d . . .
C15 C 0.8492(8) 0.8002(8) -0.0881(7) 0.081(3) Uani 1 1 d . . .
H15 H 0.839(6) 0.829(6) -0.034(6) 0.08(3) Uiso 1 1 d . . .
C16 C 0.9056(6) 0.8648(6) -0.1494(6) 0.067(2) Uani 1 1 d . . .
C17 C 0.9206(8) 0.9674(7) -0.1312(7) 0.082(3) Uani 1 1 d . . .
H17 H 0.893(7) 1.001(7) -0.089(6) 0.10(3) Uiso 1 1 d . . .
C18 C 0.9792(8) 1.0242(7) -0.1822(7) 0.077(2) Uani 1 1 d . . .
H18 H 0.981(5) 1.094(6) -0.173(5) 0.06(2) Uiso 1 1 d . . .
C19 C 1.0065(7) 0.8852(6) -0.2734(6) 0.062(2) Uani 1 1 d . . .
H19 H 1.038(5) 0.865(5) -0.317(5) 0.047(19) Uiso 1 1 d . . .
C20 C 0.9482(7) 0.8231(7) -0.2248(7) 0.071(2) Uani 1 1 d . . .
H20 H 0.946(6) 0.762(6) -0.249(6) 0.08(3) Uiso 1 1 d . . .
C21 C 0.7077(7) 0.5646(7) -0.0657(6) 0.072(2) Uani 1 1 d . . .
H21 H 0.692(7) 0.552(7) -0.132(6) 0.10(3) Uiso 1 1 d . . .
C22 C 0.6648(6) 0.5089(6) -0.0002(6) 0.063(2) Uani 1 1 d . . .
H22 H 0.628(6) 0.451(6) -0.020(5) 0.07(2) Uiso 1 1 d . . .
C23 C 0.7971(8) 0.2488(8) 0.0307(8) 0.090(3) Uani 1 1 d . . .
H23 H 0.778(5) 0.211(5) 0.095(5) 0.07(2) Uiso 1 1 d . . .
C24 C 0.8628(8) 0.3297(7) 0.0621(7) 0.081(2) Uani 1 1 d . . .
H24 H 0.878(6) 0.362(7) 0.134(6) 0.10(3) Uiso 1 1 d . . .
C25 C 0.9128(6) 0.3808(7) -0.0032(6) 0.071(2) Uani 1 1 d . . .
C26 C 0.9788(6) 0.4693(7) 0.0283(6) 0.073(2) Uani 1 1 d . . .
C27 C 0.8933(9) 0.3404(10) -0.1004(8) 0.101(4) Uani 1 1 d . . .
H27 H 0.919(9) 0.371(9) -0.142(8) 0.14(5) Uiso 1 1 d . . .
C28 C 0.8266(9) 0.2600(9) -0.1249(8) 0.107(4) Uani 1 1 d . . .
H28 H 0.813(7) 0.233(7) -0.196(7) 0.12(3) Uiso 1 1 d . . .
N1 N 0.6872(4) 0.5255(4) 0.0979(4) 0.0528(14) Uani 1 1 d . . .
N2 N 1.0229(4) 0.9848(4) -0.2539(4) 0.0546(14) Uani 1 1 d . . .
N3 N 0.7757(7) 0.2136(6) -0.0636(7) 0.096(2) Uani 1 1 d . . .
O1 O 0.7360(4) 0.4472(4) 0.3184(4) 0.0809(17) Uani 1 1 d . . .
O2 O 0.8393(5) 0.3218(5) 0.2921(4) 0.0873(18) Uani 1 1 d . . .
O3 O 1.0701(4) 0.1758(4) 0.5985(4) 0.0766(15) Uani 1 1 d . . .
O4 O 1.0570(5) 0.2367(4) 0.7422(4) 0.094(2) Uani 1 1 d . . .
O5 O 0.8736(5) 0.5762(5) 0.6621(4) 0.0900(19) Uani 1 1 d . . .
HO1 H 0.814(10) 0.624(10) 0.618(9) 0.19(5) Uiso 1 1 d . . .
H3 H 0.804(4) 0.530(5) 0.478(4) 0.038(17) Uiso 1 1 d . . .
H26 H 0.996(5) 0.483(6) 0.110(5) 0.08(2) Uiso 1 1 d . . .

loop_
 _atom_site_aniso_label
 _atom_site_aniso_U_11
 _atom_site_aniso_U_22
 _atom_site_aniso_U_33
 _atom_site_aniso_U_23
 _atom_site_aniso_U_13
 _atom_site_aniso_U_12
Zn1 0.0616(5) 0.0522(5) 0.0419(4) -0.0014(4) 0.0017(3) -0.0023(4)
C1 0.076(5) 0.047(4) 0.052(4) -0.001(3) 0.015(4) -0.008(4)
C2 0.054(4) 0.041(4) 0.041(3) -0.001(3) 0.009(3) 0.000(3)
C3 0.059(4) 0.049(4) 0.056(4) 0.009(3) 0.004(3) 0.013(4)
C4 0.076(5) 0.048(4) 0.059(4) -0.005(3) 0.016(4) 0.005(4)
C5 0.070(5) 0.060(5) 0.039(4) -0.006(3) 0.003(3) -0.008(4)
C6 0.057(4) 0.044(4) 0.047(4) 0.008(3) 0.008(3) -0.005(3)
C7 0.058(4) 0.044(4) 0.049(4) -0.007(3) 0.018(3) -0.004(3)
C8 0.069(5) 0.058(5) 0.064(5) 0.005(4) 0.010(4) -0.013(4)
C11 0.059(5) 0.059(5) 0.058(5) -0.010(4) 0.012(4) -0.007(4)
C12 0.056(5) 0.061(5) 0.069(5) -0.010(4) 0.010(4) -0.016(4)
C13 0.063(5) 0.054(4) 0.064(5) 0.008(4) 0.019(4) 0.007(4)
C14 0.079(6) 0.069(6) 0.062(5) 0.000(4) 0.013(4) 0.003(5)
C15 0.103(7) 0.067(6) 0.084(6) -0.003(5) 0.044(6) 0.002(5)
C16 0.074(5) 0.063(5) 0.069(5) 0.001(4) 0.026(4) -0.004(4)
C17 0.115(8) 0.061(6) 0.085(6) -0.005(5) 0.052(6) -0.002(5)
C18 0.103(7) 0.052(5) 0.082(6) -0.008(4) 0.036(5) -0.001(5)
C19 0.072(5) 0.060(5) 0.058(5) -0.010(4) 0.021(4) 0.000(4)
C20 0.082(6) 0.051(5) 0.084(6) -0.007(5) 0.027(5) -0.005(4)
C21 0.079(5) 0.084(6) 0.051(4) -0.001(4) 0.007(4) -0.027(5)
C22 0.069(5) 0.061(5) 0.057(5) -0.004(4) 0.007(4) -0.017(4)
C23 0.110(8) 0.072(6) 0.098(8) 0.013(6) 0.045(6) -0.001(6)
C24 0.101(7) 0.065(6) 0.080(6) 0.000(5) 0.027(5) 0.003(5)
C25 0.070(5) 0.072(5) 0.073(5) 0.003(4) 0.020(4) 0.000(4)
C26 0.069(5) 0.081(6) 0.074(6) -0.006(4) 0.026(4) -0.002(5)
C27 0.112(8) 0.127(10) 0.070(6) -0.012(6) 0.033(6) -0.040(7)
C28 0.131(9) 0.114(9) 0.079(7) -0.015(6) 0.027(7) -0.040(8)
N1 0.062(4) 0.052(3) 0.044(3) -0.002(3) 0.011(3) 0.003(3)
N2 0.064(4) 0.052(4) 0.048(3) -0.006(3) 0.011(3) 0.001(3)
N3 0.108(6) 0.081(5) 0.102(6) 0.001(5) 0.028(5) -0.024(5)
O1 0.090(4) 0.076(4) 0.063(3) -0.003(3) -0.017(3) 0.012(3)
O2 0.117(5) 0.095(4) 0.048(3) -0.015(3) 0.013(3) 0.011(4)
O3 0.079(4) 0.065(4) 0.089(4) 0.021(3) 0.025(3) 0.020(3)
O4 0.124(5) 0.074(4) 0.069(4) 0.021(3) -0.016(3) 0.001(4)
O5 0.124(5) 0.071(4) 0.073(4) -0.027(3) 0.014(4) 0.019(4)

_geom_special_details
;
 All esds (except the esd in the dihedral angle between two l.s. planes)
 are estimated using the full covariance matrix.  The cell esds are taken
 into account individually in the estimation of esds in distances, angles
 and torsion angles; correlations between esds in cell parameters are only
 used when they are defined by crystal symmetry.  An approximate (isotropic)
 treatment of cell esds is used for estimating esds involving l.s. planes.
;

loop_
 _geom_bond_atom_site_label_1
 _geom_bond_atom_site_label_2
 _geom_bond_distance
 _geom_bond_site_symmetry_2
 _geom_bond_publ_flag
Zn1 O1 1.924(5) . ?
Zn1 O3 1.978(5) 4_565 ?
Zn1 N1 2.052(6) . ?
Zn1 N2 2.069(6) 4_576 ?
Zn1 C8 2.583(8) 4_565 ?
C1 O2 1.212(8) . ?
C1 O1 1.251(9) . ?
C1 C2 1.518(9) . ?
C2 C3 1.371(9) . ?
C2 C7 1.374(9) . ?
C3 C4 1.382(10) . ?
C4 O5 1.371(8) . ?
C4 C5 1.373(10) . ?
C5 C6 1.365(9) . ?
C6 C7 1.379(9) . ?
C6 C8 1.500(10) . ?
C8 O4 1.228(9) . ?
C8 O3 1.256(9) . ?
C8 Zn1 2.583(8) 4_666 ?
C11 N1 1.328(9) . ?
C11 C12 1.364(10) . ?
C12 C13 1.388(10) . ?
C13 C21 1.360(10) . ?
C13 C14 1.479(11) . ?
C14 C15 1.277(12) . ?
C15 C16 1.488(11) . ?
C16 C17 1.357(11) . ?
C16 C20 1.383(11) . ?
C17 C18 1.359(12) . ?
C18 N2 1.338(10) . ?
C19 N2 1.323(9) . ?
C19 C20 1.375(11) . ?
C21 C22 1.362(10) . ?
C22 N1 1.335(9) . ?
C23 N3 1.346(12) . ?
C23 C24 1.368(13) . ?
C24 C25 1.384(11) . ?
C25 C27 1.405(12) . ?
C25 C26 1.447(11) . ?
C26 C26 1.314(16) 3_765 ?
C27 C28 1.357(14) . ?
C28 N3 1.321(12) . ?
N2 Zn1 2.069(6) 4_675 ?
O3 Zn1 1.978(5) 4_666 ?

loop_
 _geom_angle_atom_site_label_1
 _geom_angle_atom_site_label_2
 _geom_angle_atom_site_label_3
 _geom_angle
 _geom_angle_site_symmetry_1
 _geom_angle_site_symmetry_3
 _geom_angle_publ_flag
O1 Zn1 O3 142.7(3) . 4_565 ?
O1 Zn1 N1 103.7(2) . . ?
O3 Zn1 N1 97.2(2) 4_565 . ?
O1 Zn1 N2 93.5(2) . 4_576 ?
O3 Zn1 N2 110.8(2) 4_565 4_576 ?
N1 Zn1 N2 104.6(2) . 4_576 ?
O1 Zn1 C8 121.8(2) . 4_565 ?
O3 Zn1 C8 28.2(2) 4_565 4_565 ?
N1 Zn1 C8 125.3(2) . 4_565 ?
N2 Zn1 C8 101.5(2) 4_576 4_565 ?
O2 C1 O1 125.7(7) . . ?
O2 C1 C2 120.7(7) . . ?
O1 C1 C2 113.5(6) . . ?
C3 C2 C7 119.5(6) . . ?
C3 C2 C1 120.8(6) . . ?
C7 C2 C1 119.6(6) . . ?
C2 C3 C4 121.0(7) . . ?
O5 C4 C5 119.3(7) . . ?
O5 C4 C3 121.9(7) . . ?
C5 C4 C3 118.8(7) . . ?
C6 C5 C4 120.7(6) . . ?
C5 C6 C7 120.1(6) . . ?
C5 C6 C8 119.2(6) . . ?
C7 C6 C8 120.5(6) . . ?
C2 C7 C6 119.8(6) . . ?
O4 C8 O3 121.1(8) . . ?
O4 C8 C6 121.5(8) . . ?
O3 C8 C6 117.4(7) . . ?
O4 C8 Zn1 73.1(5) . 4_666 ?
O3 C8 Zn1 48.1(4) . 4_666 ?
C6 C8 Zn1 164.7(6) . 4_666 ?
N1 C11 C12 124.3(7) . . ?
C11 C12 C13 118.6(7) . . ?
C21 C13 C12 117.4(7) . . ?
C21 C13 C14 121.7(7) . . ?
C12 C13 C14 120.8(7) . . ?
C15 C14 C13 124.1(9) . . ?
C14 C15 C16 127.4(9) . . ?
C17 C16 C20 116.9(8) . . ?
C17 C16 C15 121.0(8) . . ?
C20 C16 C15 122.0(8) . . ?
C16 C17 C18 120.7(9) . . ?
N2 C18 C17 123.3(8) . . ?
N2 C19 C20 123.6(8) . . ?
C19 C20 C16 119.2(8) . . ?
C13 C21 C22 120.3(8) . . ?
N1 C22 C21 123.0(7) . . ?
N3 C23 C24 123.7(9) . . ?
C23 C24 C25 121.0(9) . . ?
C24 C25 C27 114.8(9) . . ?
C24 C25 C26 121.3(8) . . ?
C27 C25 C26 123.9(8) . . ?
C26 C26 C25 127.1(11) 3_765 . ?
C28 C27 C25 120.1(10) . . ?
N3 C28 C27 125.2(11) . . ?
C11 N1 C22 116.3(7) . . ?
C11 N1 Zn1 121.4(5) . . ?
C22 N1 Zn1 122.1(5) . . ?
C19 N2 C18 116.3(7) . . ?
C19 N2 Zn1 123.4(5) . 4_675 ?
C18 N2 Zn1 118.9(5) . 4_675 ?
C28 N3 C23 115.2(9) . . ?
C1 O1 Zn1 122.5(5) . . ?
C8 O3 Zn1 103.8(5) . 4_666 ?

_diffrn_measured_fraction_theta_max    0.986
_diffrn_reflns_theta_full              25.06
_diffrn_measured_fraction_theta_full   0.986
_refine_diff_density_max    0.703
_refine_diff_density_min   -0.420
_refine_diff_density_rms    0.077
 
_publ_section_references
;
 Sheldrick G.M.(1996), SADABS, Absorption Correction Program, University of
 Goeltingen, German
 Siemens(1994), SAINT Software Reference Manual, Siemens Energy &
 Automation Inc., Madison, Wisconsin, USA
 Siemens(1996), SMART Software Reference Manual, Siemens Energy &
 Automation Inc., Madison, Wisconsin, USA
 Siemens(1994), SHELXTL^TM^ Version 5 Reference Manual, Siemens Energy &
 Automation Inc., Madison, Wisconsin, USA
 Sheldrick G.M.(1997), The SHELX-97 Manual
;
